# Supplementary material
Source: publisher site journal article supplement (https://www.spandidos-publications.com/3694/downloadSupplementary)
Supplement: Supplementary file 1 [file downloadSupplementary]

## Sheet: 三组数据
Table SI. Baseline and hyperemia characteristics of the three groups of animals.
Pig Number	Therapeutic Method	intervention methods	Weight	Male	Diameter of LAD(mm)	ventricular tachycardia or fibrillation	Time of electrical defibrillation	Experiment Date	Baseline HR1	Baseline HR2	Baseline HR3	Baseline HR4	Baseline HR5	Baseline HR6	Baseline Pa1	Baseline Pa2	Baseline Pa3	Baseline Pa4	Baseline Pa5	Baseline Pa6	Baseline Pd1	Baseline Pd2	Baseline Pd3	Baseline Pd4	Baseline Pd5	Baseline Pd6	Hyperemic HR1	Hyperemic HR2	Hyperemic HR3	Hyperemic HR4	Hyperemic HR5	Hyperemic HR6	Hyperemic Pa1	Hyperemic Pa2	Hyperemic Pa3	Hyperemic Pa4	Hyperemic Pa5	Hyperemic Pa6	Hyperemic Pd1	Hyperemic Pd2	Hyperemic Pd3	Hyperemic Pd4	Hyperemic Pd5	Hyperemic Pd6	CFR1	CFR2	CFR3	CFR4	CFR5
1			18	1	2			2016-03-05	88						103	80					100	73
5			18.5	1	2.1			2016-04-09	105						122	104	111				115	97	102
6			19	1	2.3			2016-04-16	96						132	92	91	100			123	87	88	90
7	1	ALP	18	1	1.9	1	1	2016-04-17	80	94	84	98	83	85	102	97	92	98	100	117	99	91	88	90	96	110	106	103	95	115	101	115	62	81	85	75	80	58	56	74	80	62	74	55	3.4	3.1	3.7	3.6	3.4
8			21	1	1.8			2016-04-23	98						127	103					100	92
10	1	ALP	19.5	1	2.2	3	11	2016-05-10	74	90	94	110	88	98	121	92	81	110	89	105	114	87	70	100	77	103	122	118	122	121	117	109	72	66	64	90	58	58	69	57	54	80	48	48	4.1	2.3	2.4	2.3	3.2
11	1	ALP	20	1	2.1	1	1	2017-05-18	71	82	79	89	87	104	123	94	85	122	90	124	123	87	82	117	78	123	108	99	94	101	125	124	73	46	48	78	63	79	70	39	43	69	55	76	4.1	3.4	3.5	3.1	2
13	1	ALP	21	1	2.3	2	3	2017-05-29	82	98	100	100	88	89	101	90	79	86	89	101	100	82	76	78	85	93	129	118	112	130	109	123	74	47	68	48	40	76	70	46	67	48	38	72	3.7	2.8	3.5	2	1.7
14	1	ALP	19.5	1	1.8	2	4	2016-05-31	88	91	104	85	75	92	95	90	85	94	92	94	94	87	80	73	86	93	124	113	124	112	87	106	60	65	64	68	58	72	59	63	62	66	31	70	3.7	3.3	3.5	2.2	2.8
15	5	SHAM	21	1	2.2	4	7	2016-06-09	82	102	98	74	89	85	120	86	92	84	98	124	117	83	88	83	94	120	129	134	121	106	114	109	66	56	62	61	71	66	62	52	59	60	63	64	3.9	2.8	2.4	2.7	2.1
16	5	SHAM	21.5	1	2.5	2	4	2016-06-13	96	104	94	100	89	81	123	108	107	94	96	106	121	105	100	88	89	103	136	121	110	128	119	109	87	78	75	64	69	71	82	72	70	56	64	65	4.6	4.1	3.8	3.4	2.6
17	5	SHAM	20	1	1.4	3	5	2016-08-03	90	101	110	94	108	86	114	87	86	89	97	109	113	76	74	76	91	100	109	127	121	114	131	117	79	56	52	59	61	75	77	49	43	55	53	69	4.5	3.9	3.2	2.9	2.1
18	5	SHAM	22.5	1	2	2	4	2017-08-05	77	89	92	99	87	79	109	84	83	96	94	105	107	75	77	84	91	101	112	104	110	116	107	116	70	64	54	67	67	75	66	61	48	57	60	72	3.6	2.6	2.7	2.3	2.2
19	1	ALP	25.5	1	1.8	0	0	2017-08-07	68	88	92	95	90	80	111	100	97	94	99	112	109	89	83	86	94	108	93	107	118	114	127	106	77	70	64	69	59	67	72	61	56	61	55	61	3.1	2.3	2.2	2.5	2.7
22	3	NCR	22.5	0	2	1	3	2017-09-02	81	68	59	79	85	79	105	84	96	100	106	104	104	80	95	94	103	100	110	115	115	104	98	99	64	55	86	84	77	67	60	54	84	80	76	65	3.9	3.2	3	2.8	3.2
23	3	NCR	23.5	1	1.9	0	0	2017-09-04	75	70	93	86	76	104	98	93	90	95	93	86	97	86	82	92	92	83	115	99	112	119	114	125	67	65	66	71	73	64	64	58	62	69	71	56	4.3	2.6	3.1	2.9	2.3
26	3	NCR	23.5	1	1.7	2	3	2017-03-12	88	100	94	89	71	68	110	92	95	99	104	107	108	90	89	91	100	100	139	119	124	120	109	116	78	72	67	71	70	70	73	64	60	64	59	60	4.1	3.2	3.1	3.3	3.2
28	3	NCR	23	1	1.8	3	3	2017-09-13	89	98	97	106	101	101	99	94	96	99	83	87	96	93	87	96	73	86	118	111	109	122	118	124	73	68	75	87	73	62	60	58	61	85	60	55	4	2.9	2.6	3.5	3
30	5	SHAM	26	1	2.3	0	0	2017-10-09	72	91	80	77	84	72	105	94	92	100	92	102	105	93	92	100	88	99	105	109	106	90	93	83	62	53	51	56	52	59	63	58	55	60	56	59	3.6	2.7	2.9	2.6	2.9
31	3	NCR	27	1	2	1	1	2017-05-30	84	115	88	72	76	70	120	95	93	93	110	113	112	92	81	89	109	107	101	126	128	88	95	88	77	63	72	80	72	89	70	52	65	74	64	82	2	2.6	2.3	2.1	1.9
32	3	NCR	28	1	2.3	3	5	2017-10-13	91	95	108	93	84	85	93	88	73	74	79	87	92	84	65	72	76	78	126	105	127	108	121	101	76	65	58	54	55	54	70	61	46	49	52	53	3.6	2.9	1.6	3.5	1.8
34	5	SHAM	22	1	2.2	4	4	2017-10-19	83	89	95	80	75	81	112	80	84	89	87	94	110	78	84	88	86	90	110	103	100	106	98	96	70	65	70	62	67	63	55	50	54	52	61	57	4.3	2.8	3.6	2.4	3
[truncated: 51 more columns]
